# Supplementary material for: Methanethiol, dimethyl sulfide and acetone over biologically productive waters in the southwest Pacific Ocean
Source: Copernicus journal article supplement (doi:10.5194/acp-20-3061-2020), 2020-03-16
Supplement: Supplementary file 1 [file acp-20-3061-2020-supplement.pdf]

Supplement of Atmos. Chem. Phys., 20, 3061–3078, 2020  
<https://doi.org/10.5194/acp-20-3061-2020-supplement>  
© Author(s) 2020. This work is distributed under  
the Creative Commons Attribution 4.0 License.

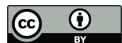

*Supplement of*

## **Methanethiol, dimethyl sulfide and acetone over biologically productive waters in the southwest Pacific Ocean**

**Sarah J. Lawson et al.**

*Correspondence to:* Sarah J. Lawson ([sarah\\_jane\\_lawson@yahoo.com.au](mailto:sarah_jane_lawson@yahoo.com.au))

The copyright of individual parts of the supplement might differ from the CC BY 4.0 License.

1 Supplementary information

2 Table S1. Measurement specifications for biogeochemical parameters

| Parameter                                             | Specification                                                             | Reference                                     |
|-------------------------------------------------------|---------------------------------------------------------------------------|-----------------------------------------------|
| salinity (psu)                                        | accuracy of $\pm 0.1$ , precision<br>0.01                                 | Seabird thermosalinograph<br>SBE-21 manual    |
| sea temperature ( $^{\circ}\text{C}$ )                | 0.01 $^{\circ}\text{C}$ accuracy                                          | Seabird thermosalinograph<br>SBE-21 manual    |
| beta -660 backscatter                                 | Sensitivity $\sim 4 \times 10^{-6} \text{ m}^{-2} \text{ sr}^{-1}$        | ECO triplet Users Guide                       |
| DMS <sub>sw</sub> (nM)                                | Accuracy: $\pm 5\%$ standard<br>error<br>Precision: $< \pm 15\%$          | Walker et al., (2016)                         |
| Chla ( $\text{mg m}^{-3}$ )                           | Sensitivity $0.02 \mu\text{g L}^{-1} \sim \text{mg}$<br>$\text{m}^{-3}$   | UMCES Tech Rep Ser. Ref<br>[UMCES] CBL 06-053 |
| particulate nitrogen ( $\text{mg m}^{-3}$ )           | 2% precision                                                              | Nodder et al., (2016)                         |
| cryptophyte algae ( $\text{cells mL}^{-1}$ )          | n/a                                                                       | Safi et al., (2007)                           |
| eukaryotic picoplankton<br>( $\text{cells mL}^{-1}$ ) | n/a                                                                       | Safi et al., (2007)                           |
| DMSPt ( $\text{nmol L}^{-1}$ )                        | Accuracy: $\pm 5\%$ standard<br>error<br>Precision: $< \pm 15\%$          | Walker et al., (2016)                         |
| DMSPp ( $\text{nmol L}^{-1}$ )                        | Accuracy: $\pm 5\%$ standard<br>error<br>Precision: $< \pm 15\%$          | Walker et al., (2016)                         |
| CDOM (ppb)                                            | Sensitivity $\sim 0.2$ ppb                                                | Gall et al., (2013)                           |
| phosphate ( $\mu\text{mol L}^{-1}$ )                  | Precision: $0.48 \mu\text{mol L}^{-1} \pm$<br>$0.03 \mu\text{mol L}^{-1}$ | Law et al., (2017)                            |
| nitrate ( $\mu\text{mol L}^{-1}$ )                    | Precision: $5.5 \mu\text{mol L}^{-1} \pm 0.2$<br>$\mu\text{mol L}^{-1}$   | Law et al., (2017)                            |
| silicate ( $\mu\text{mol L}^{-1}$ )                   | Precision: $14.1 \mu\text{mol L}^{-1} \pm 0.6$<br>$\mu\text{mol L}^{-1}$  | Law et al., (2017)                            |

3

4 Gall, M. P., Davies-Colley, R. J., and Merrilees, R. A.: Exceptional visual clarity and optical purity in a sub-alpine  
5 lake, *Limnology and Oceanography*, 58, 443-451, 10.4319/lo.2013.58.2.0443, 2013.

6

7 Law, C. S., Smith, M. J., Harvey, M. J., Bell, T. G., Cravigan, L. T., Elliott, F. C., Lawson, S. J., Lizotte, M.,  
8 Marriner, A., McGregor, J., Ristovski, Z., Safi, K. A., Saltzman, E. S., Vaattovaara, P., and Walker, C. F.:  
9 Overview and preliminary results of the Surface Ocean Aerosol Production (SOAP) campaign, *Atmos. Chem.*  
10 *Phys.*, 17, 13645-13667, 10.5194/acp-17-13645-2017, 2017.

11

12 Nodder, S. D., Chiswell, S. M., and Northcote, L. C.: Annual cycles of deep-ocean biogeochemical export fluxes  
13 in subtropical and subantarctic waters, southwest Pacific Ocean, *Journal of Geophysical Research: Oceans*, 121,  
14 2405-2424, 10.1002/2015jc011243, 2016.  
15  
16 Safi, K. A., Griffiths, F.B., and Hall, J. A.: Microzooplankton composition, biomass and grazing rates along the  
17 WOCE SR3 line between Tasmania and Antarctica, *Deep Sea Research Part I: Oceanographic Research Papers*,  
18 54, 1025-1041, <https://doi.org/10.1016/j.dsr.2007.05.003>, 2007.  
19  
20  
21 Walker, C. F., Harvey, M. J., Smith, M. J., Bell, T. G., Saltzman, E. S., Marriner, A. S., McGregor, J. A., and  
22 Law, C. S.: Assessing the potential for dimethylsulfide enrichment at the sea surface and its influence on air-sea  
23 flux, *Ocean Sci.*, 12, 1033-1048, 10.5194/os-12-1033-2016, 2016.  
24  
25
